# Supplementary material for: The RNFT2/IL-3Rα axis regulates IL-3 signaling and innate immunity
Source: JCI journal article supplement (doi:10.1172/jci.insight.133652), 2020-01-28

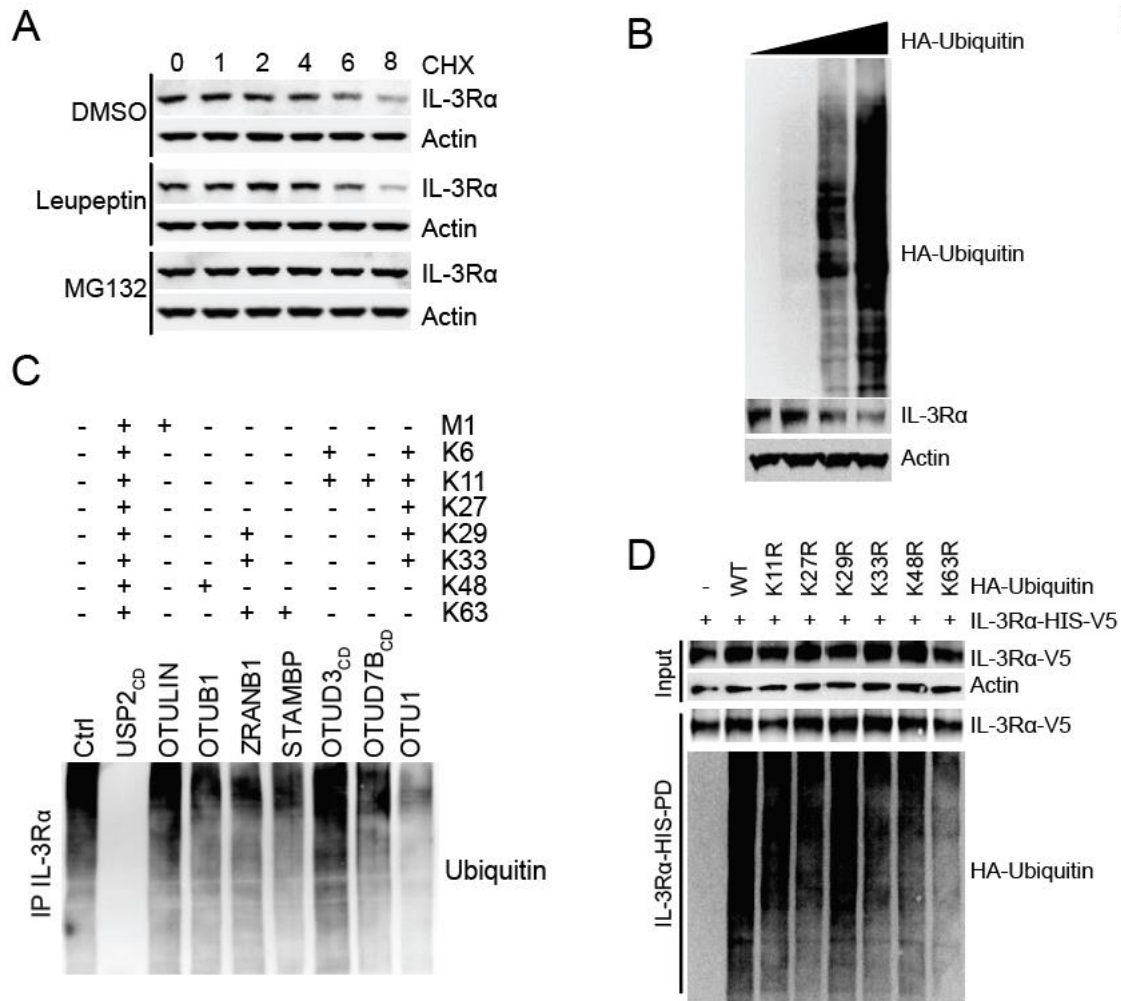

Figure S1

**Figure S1. IL-3R $\alpha$  is ubiquitinated and assembles specific poly-ubiquitin linkage types.** (A) Western blot analysis of IL-3R $\alpha$  abundance in lysates of RAW 264.7 cells treated with cycloheximide (CHX) with or without MG-132 or Leupeptin over time. Blots are representative of 2 independent experiments. (B) Western blot analysis of IL-3R $\alpha$  abundance in lysates of MLE cells transfected with increasing amounts of a HA-Ubiquitin construct. Blots are representative of 2 independent experiments. (C) UbiCREST analysis of IL-3R $\alpha$  immunoprecipitates from lysate of MLE cells after MG132 treatment. Blots are representative of 2 independent experiments. (D) Western blot analysis of IL-3R $\alpha$  and Ubiquitin in IL-3R $\alpha$  immunoprecipitates from lysate of MLE cells transfected with V5-IL-3R $\alpha$  and HA-Ubiquitin K $\rightarrow$ R point mutants after MG132 treatment. Blots are representative of 2 independent experiments.

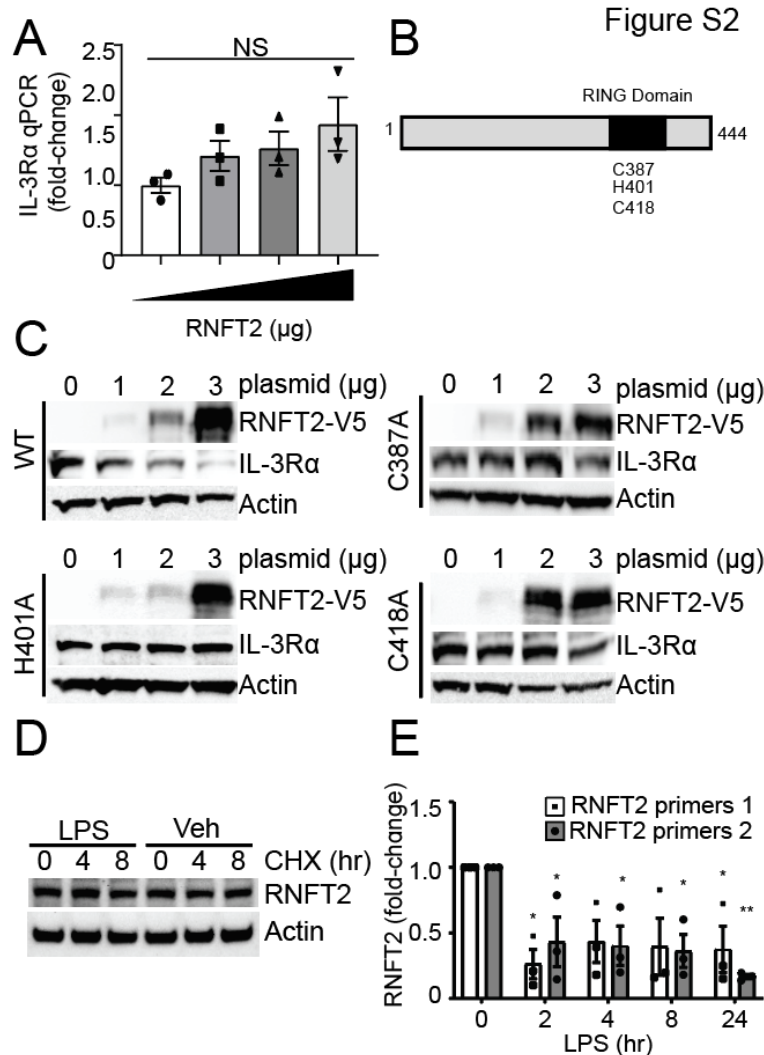

**Figure S2. RNFT2 is a RING Ubiquitin E3 ligase and is transcriptionally down-regulated by LPS (A)** RT-qPCR analysis of IL-3Rα mRNA expression in MLE cells transfected with increasing amounts of RNFT2. Data are pooled from 3 independent experiments. **(B)** Schematic of RNFT2 sequence and critical residues within its predicted RING domain. **(C)** Western blot analysis of IL-3Rα abundance in lysates of MLE cells transfected with increasing amounts of RNFT2 WT and RING mutant constructs. **(D)** Immunoblot analysis of MLE cells treated with CHX time course without or with LPS co-treatment. **(E)** RT-qPCR analysis of RNFT2 mRNA expression in MLE cells treated with a time course of LPS and represented as fold change relative to 0hr time point. Blots are representative of 2-3 independent

experiments. Data and means  $\pm$  SEM of 3 independent experiments NS,  $P > 0.05$ ,  $*P < 0.05$ ,  $**P < 0.01$ ; by one-way ANOVA with Dunnett's post hoc test (A, E).

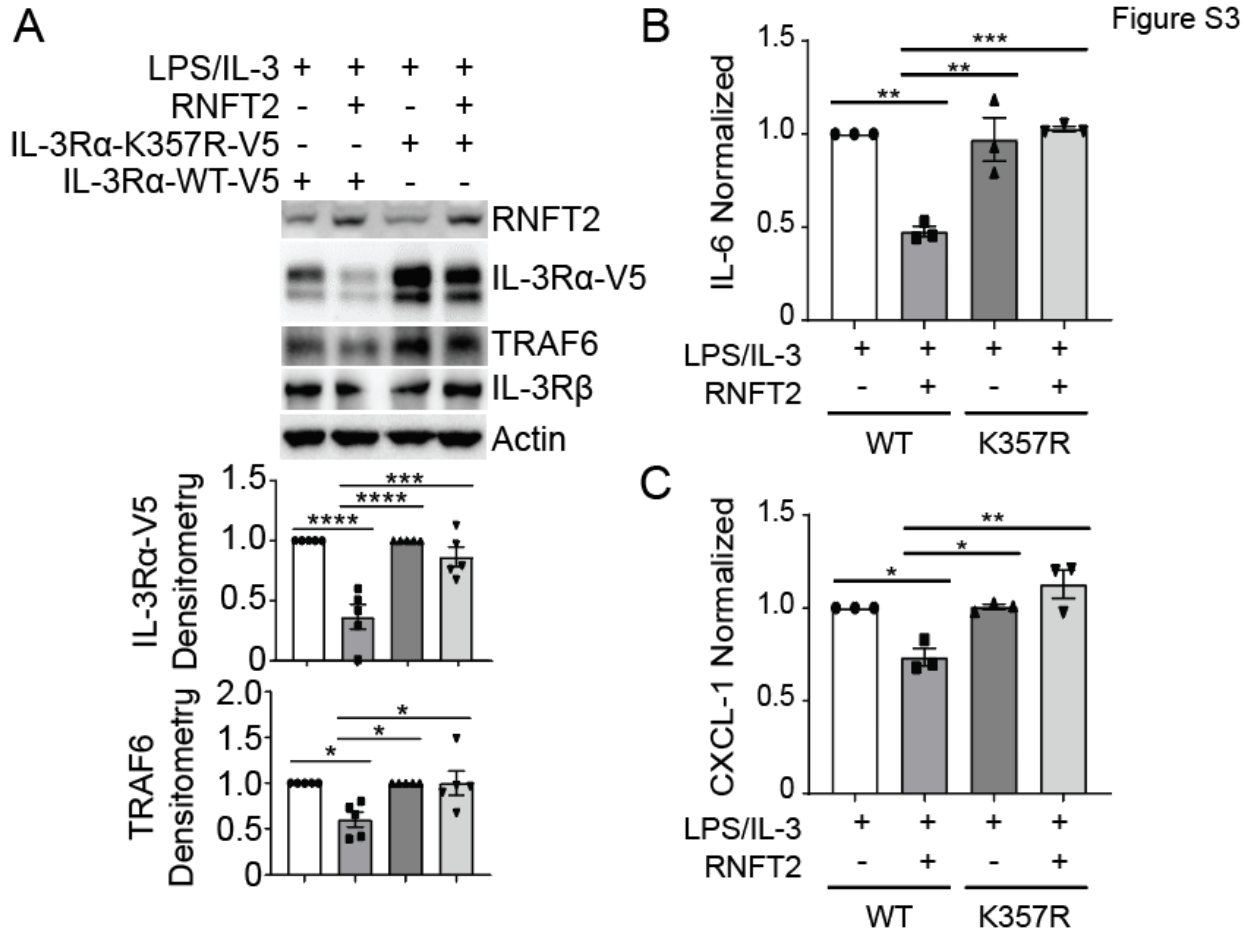

**Figure S3. RNFT2 effect on inflammation proceeds through IL-3R $\alpha$**  (A) Immunoblot analysis of IL-3R $\alpha$ , IL-3R $\beta$ , and TRAF6 from MLE co-expressing WT or ubiquitin-resistant K357R mutant IL-3R $\alpha$  and RNFT2 prior to LPS and IL-3 treatment. Data and means  $\pm$  SEM of 5 independent experiments. (B-C) ELISA analysis of IL-6 and CXCL-1 abundances from MLE co-expressing WT or ubiquitin-resistant K357R mutant IL-3R $\alpha$  and RNFT2 prior to LPS and IL-3 treatment. Data and means  $\pm$  SEM of 3 independent experiments NS,  $P > 0.05$ ,  $*P < 0.05$ ,  $**P < 0.01$ ,  $***P < 0.001$ ,  $****P < 0.0001$  by one-way ANOVA with Tukey's post hoc test (A-C).

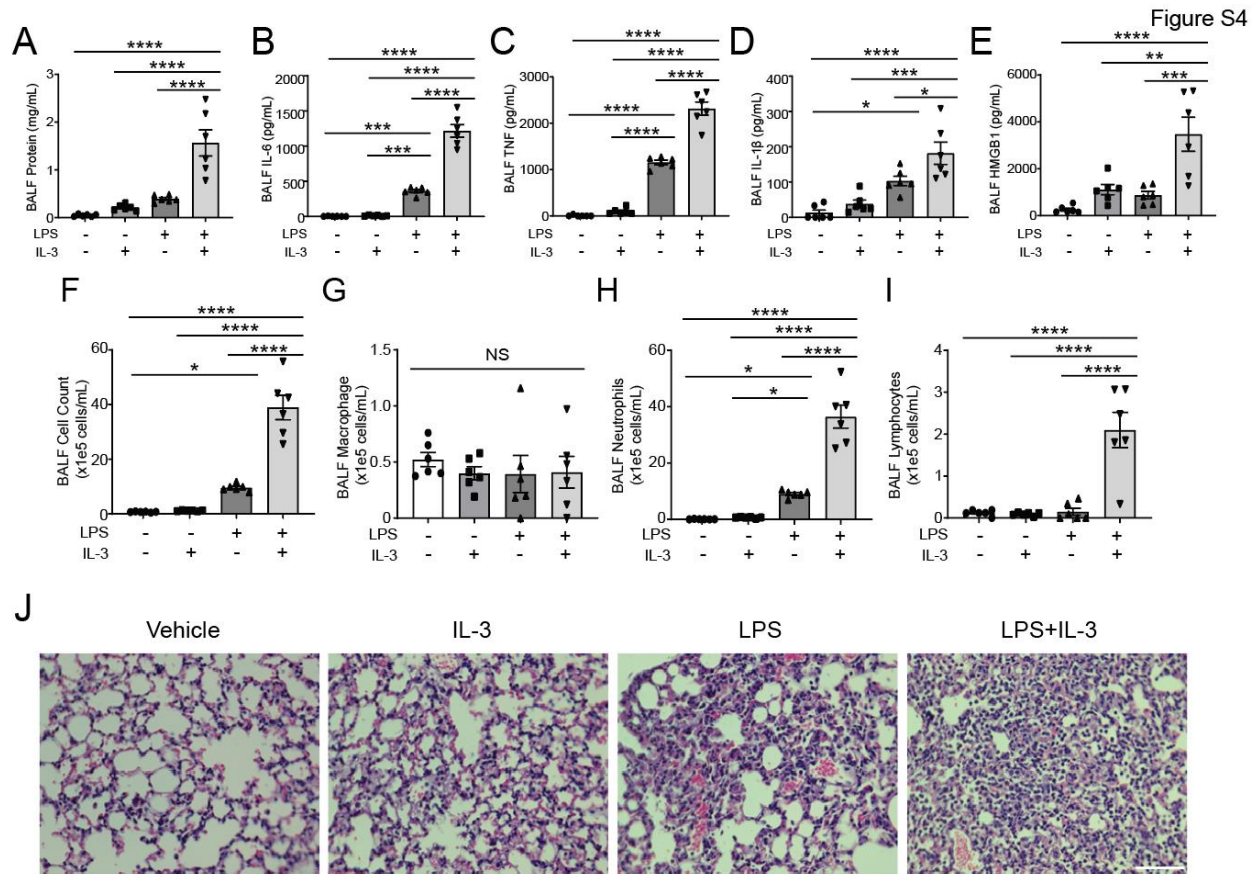

**Figure S4. IL-3 aggravates LPS-induced lung injury *in vivo*** (A to E) ELISA analysis of total protein (A), IL-6 (B), TNF (C), IL-1 $\beta$  (D) and HMGB1 (E) concentration in BAL fluid from mice intratracheally treated with LPS and PBS or recombinant IL-3, as indicated. (F to I) Number of total cells (F), macrophages (G), neutrophils (H), and lymphocytes (I) in BAL fluid from mice treated intratracheally with LPS and PBS or recombinant IL-3, as indicated. Data are means  $\pm$  SEM of 3 mice per group from 2 independent experiments. (J) Histological analysis of lung samples from mice treated as indicated. Images are representative of all independent experiments. Scale bar, 100  $\mu$ m. \*P < 0.05, \*\*P < 0.01, \*\*\*P < 0.001, \*\*\*\*P < 0.0001, by one-way ANOVA with Tukey's post hoc test (A-I).

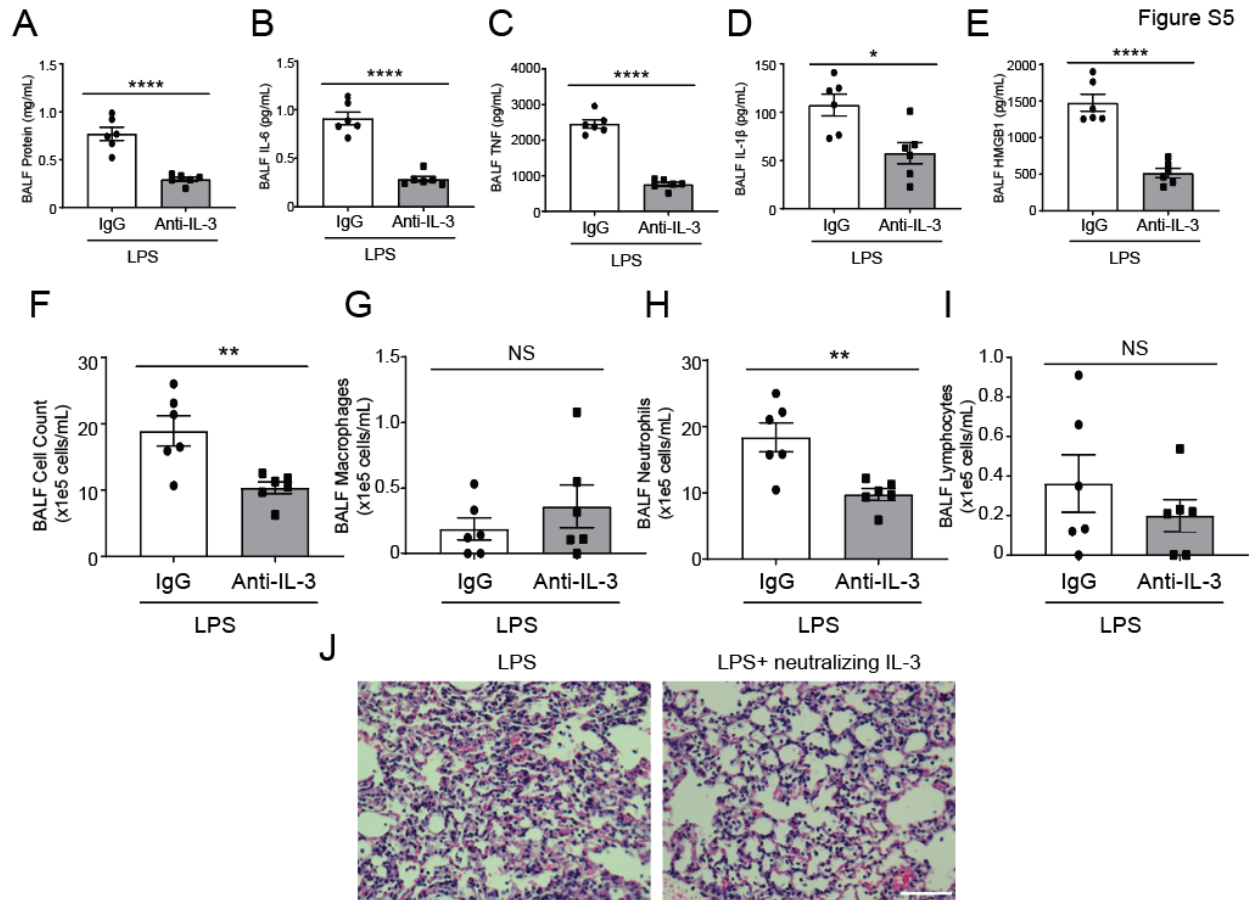

**Figure S5. IL-3 blocking antibody attenuates LPS-induced lung injury.** (A to E) ELISA analysis of total protein (A), IL-6 (B), TNF (C), IL-1 $\beta$  (D) and HMGB1 (E) concentration in BAL fluid from intratracheally treated with LPS and control or neutralizing IL-3 antibody, as indicated. Mice were euthanized after 18h, and lungs were lavaged with saline, and BALF were measured from mice. (F to I) Number of total cells (F), macrophages (G), neutrophils (H), and lymphocytes (I) in BAL fluid of mice treated intratracheally with LPS and control or neutralizing IL-3 antibody, as indicated. (J) Histological analysis of lung samples from mice treated as indicated. Images are representative of all independent experiments. Scale bar, 100  $\mu$ m. Data are means  $\pm$  SEM of 3 mice per group from 2 independent experiments. NS,  $P > 0.05$ , \* $P < 0.05$ , \*\* $P < 0.01$ , \*\*\* $P < 0.001$ , \*\*\*\* $P < 0.0001$ , by Student's t-test (A-I).

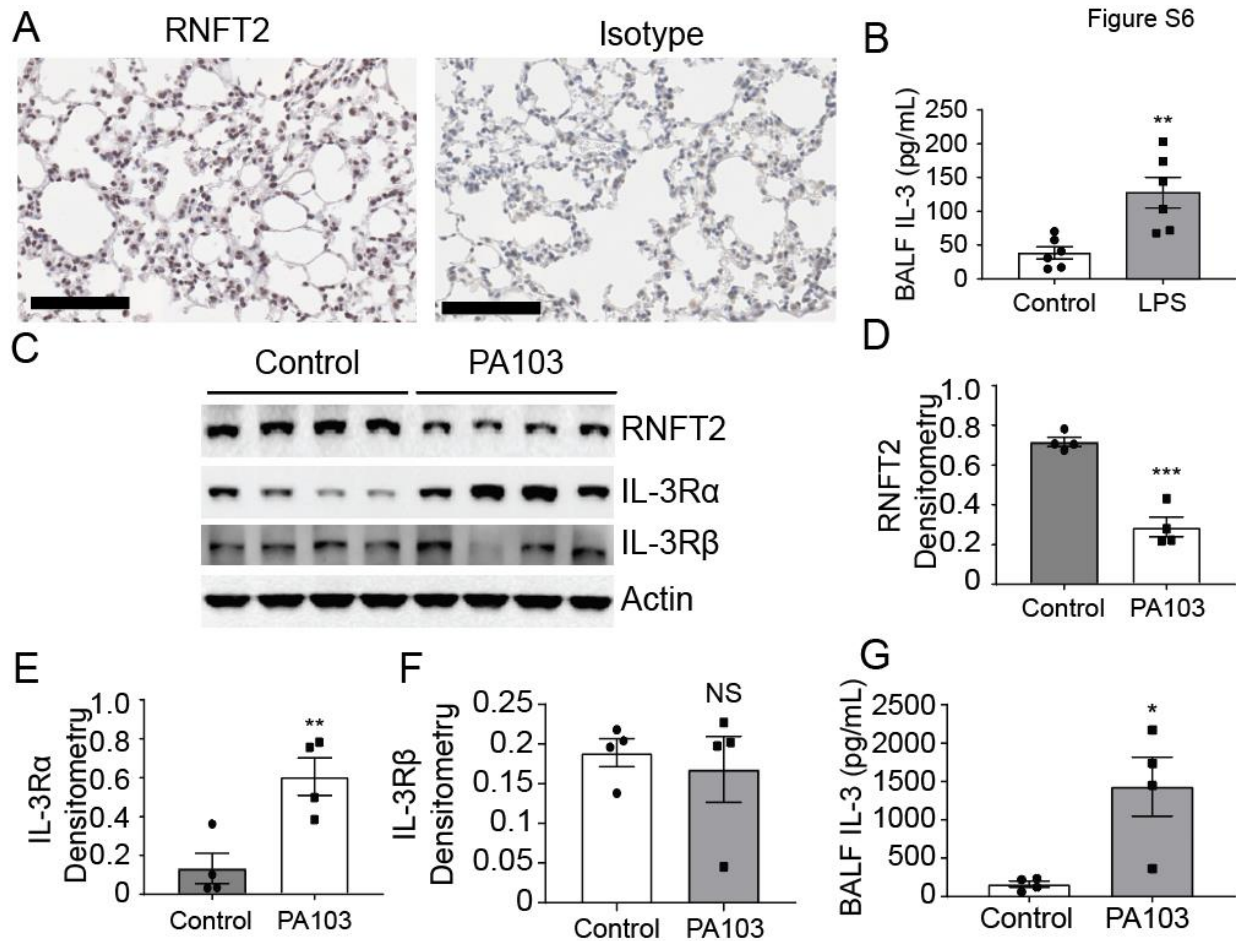

**Figure S6. Bacterial infection influences Rnft2:Il3ra protein levels** (A) Immunohistochemical staining of Rnft2 in murine lung, scale bar = 100 $\mu$ m, Isotype control staining is also shown (B). ELISA analysis of IL3 in mouse BAL fluid treated intratracheally with LPS and PBS as indicated. Data are means  $\pm$  SEM of 3 mice per group from 2 independent experiments. (C-F). Immunoblot analysis of mouse lung homogenate from Control or PA103-treated mice. (C). Protein densitometry analysis of RNFT2 (D), IL-3R $\alpha$  (E), and IL-R $\beta$ (F), from data in (C). (G). ELISA analysis of IL3 in mouse BAL fluid treated intratracheally with PA103 and PBS as indicated. Data are means  $\pm$  SEM of 3 mice per group from 2 independent experiments. NS,  $P > 0.05$ , \* $P < 0.05$ , \*\* $P < 0.01$ , \*\*\* $P < 0.001$ , by Student's t-test (B, D, E-G).

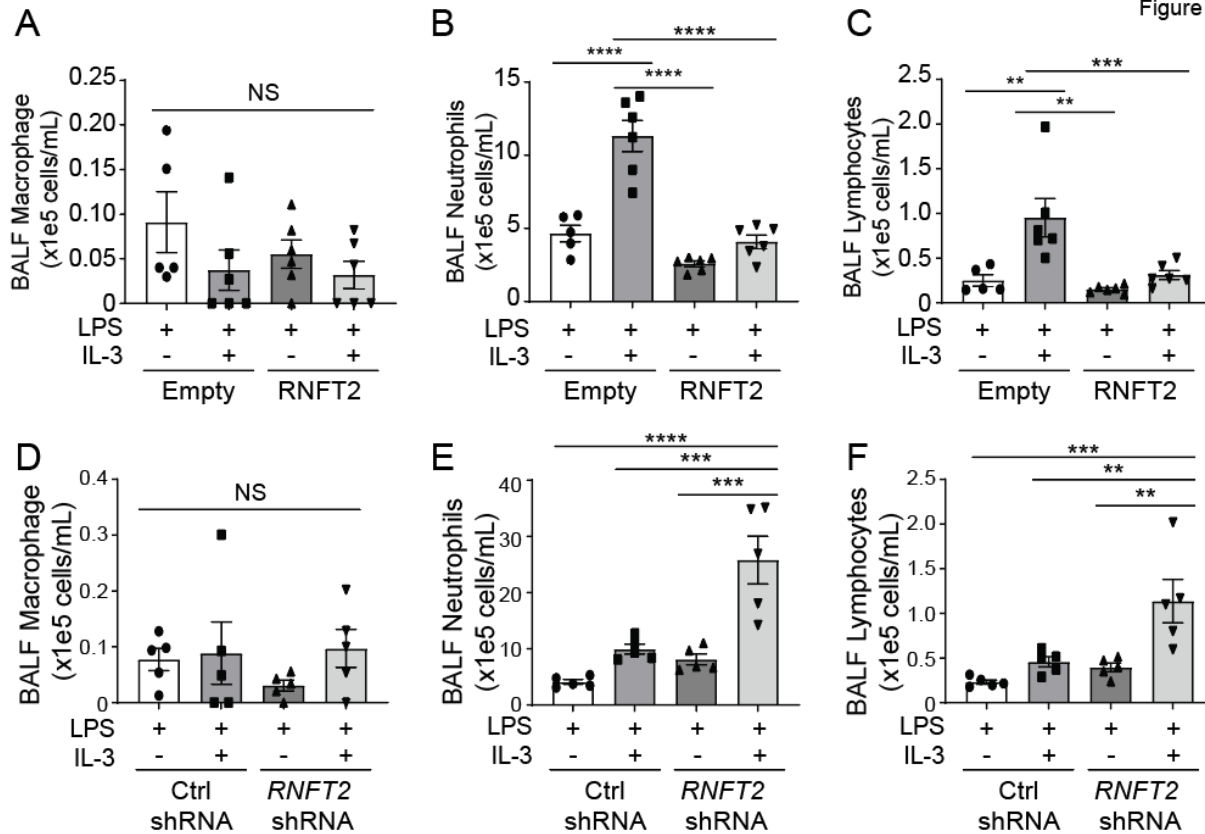

**Figure S7. RNFT2 regulates neutrophils counts in lung inflammation and injury.** (A to C) Total number of cells (A), neutrophils (B), and lymphocytes (C) in BAL fluid from mice that received Lenti-Empty or Lenti-RNFT2 intratracheally before treatment with LPS with rIL-3, as indicated. Mice were euthanized after 18h, and lungs were lavaged with saline, and lavage cells were then processed for Wright-Giemsa stain; lavage macrophages, neutrophils, and lymphocytes were counted and graphed (A-C). (D to F) Total number of macrophages (D), neutrophils (B), and lymphocytes (C) in BAL fluid from mice that received Lenti-control shRNA or Lenti-RNFT2 shRNA intratracheally before treatment with LPS and rIL-3, as indicated. All data and means  $\pm$  SEM of 2-3 mice per group are from 2 independent experiments.

\*P < 0.05, \*\*P < 0.01, and \*\*\*P < 0.001 by one-way ANOVA with Tukey's post hoc test (A-F).

| Category       | Age  | Sex    | FiO2 | Primary ARDS Risk Factor | IL-3  | TNF $\alpha$ | CCL4  | IL1 $\beta$ | IL8   |
|----------------|------|--------|------|--------------------------|-------|--------------|-------|-------------|-------|
| No Lung Injury | 46.0 | Male   | 40   |                          | 34.6  | 14.0         | 29.5  | 2.0         | 23.7  |
| No Lung Injury | 68.6 | Male   | 40   |                          | 40.4  | 22.7         | 19.6  | 2.5         | 26.3  |
| No Lung Injury | 73.6 | Male   | 40   |                          | 41.0  | 22.7         | 56.5  | 3.0         | 38.5  |
| No Lung Injury | 71.3 | Male   | 40   |                          | 22.8  | 9.3          | 60.6  | 1.5         | 21.3  |
| ARFA           | 29.2 | Male   | 100  | Aspiration               | 156.6 | 26.8         | 39.2  | 3.1         | 33.0  |
| ARFA           | 62.0 | Male   | 40   | Non-pulmonary sepsis     | 80.0  | 23.9         | 183.3 | 3.1         | 77.6  |
| ARFA           | 33.1 | Male   | 50   | Pneumonia                | 42.3  | 15.2         | 42.2  | 2.5         | 24.8  |
| ARFA           | 63.9 | Male   | 40   | Non-pulmonary sepsis     | 62.2  | 5.7          | 64.8  | 1.8         | 15.3  |
| ARFA           | 58.3 | Male   | 40   | Pneumonia                | 32.3  | 39.3         | 47.9  | 3.7         | 34.0  |
| ARFA           | 60.3 | Female | 40   | Pneumonia                | 57.0  | 12.2         | 65.2  | 2.0         | 21.3  |
| ARFA           | 59.4 | Male   | 60   | Non-pulmonary sepsis     | 38.7  | 18.7         | 193.7 | 2.6         | 115.0 |
| ARFA           | 66.2 | Female | 50   | Non-pulmonary sepsis     | 171.9 | 26.8         | 189.0 | 3.4         | 78.2  |
| ARFA           | 45.2 | Male   | 60   | Aspiration               | 35.9  | 0.0          | 113.3 | 0.5         | 26.8  |
| ARFA           | 42.6 | Female | 40   | Non-pulmonary sepsis     | 110.1 | 25.1         | 129.7 | 3.6         | 117.4 |
| ARFA           | 67.1 | Female | 50   | Non-pulmonary sepsis     | 113.7 | 0.0          | 108.7 | 1.2         | 38.3  |
| ARFA           | 57.5 | Male   | 40   | Aspiration               | 63.8  | 0.0          | 129.7 | 0.1         | 32.7  |
| ARFA           | 32.1 | Female | 40   | Pneumonia                | 124.8 | 65.2         | 76.9  | 6.6         | 90.9  |
| ARFA           | 25.2 | Male   | 40   | Pneumonia                | 37.0  | 0.0          | 45.1  | 1.2         | 14.6  |
| ARFA           | 60.6 | Male   | 60   | Pneumonia                | 309.1 | 90.2         | 252.1 | 9.1         | 107.7 |
| ARFA           | 66.5 | Female | 50   | Blood Transfusion        | 44.8  | 0.0          | 77.8  | 1.9         | 40.1  |

**Supplemental Table 1:** Demographic and Clinical Characteristics of subjects for which IL-3 and other pro-inflammatory cytokines were obtained in the University of Pittsburgh Acute Lung Injury Registry. FiO2 = Fraction of inspired oxygen; ARDS = Acute Respiratory Distress Syndrome



Full unedited gel for Figure 1A:

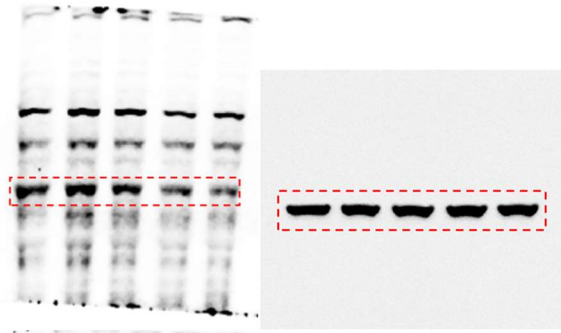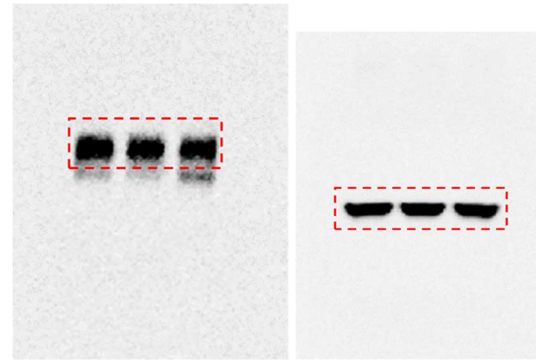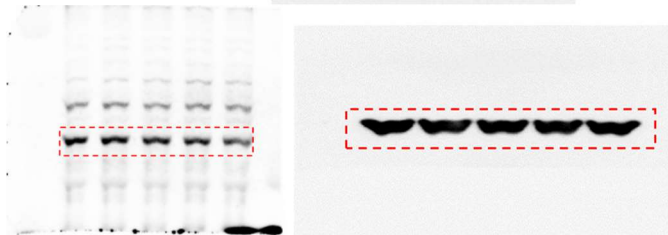

Full unedited gel for Figure 1D:

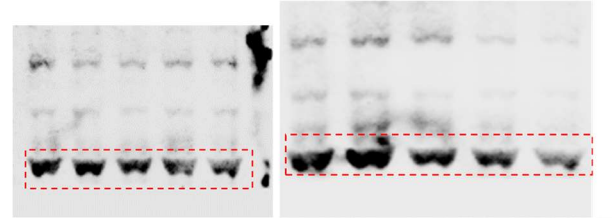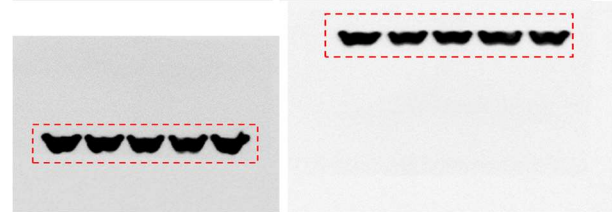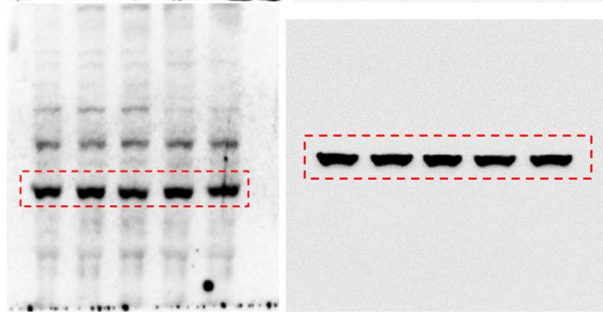

Full unedited gel for Figure 1E:

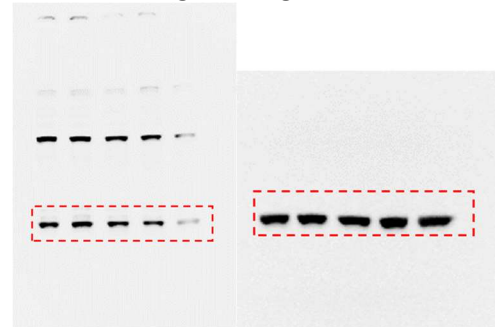

Full unedited gel for Figure 1B:

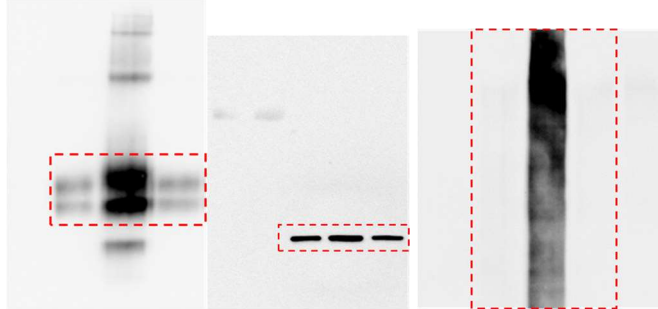

Full unedited gel for Figure 1C:

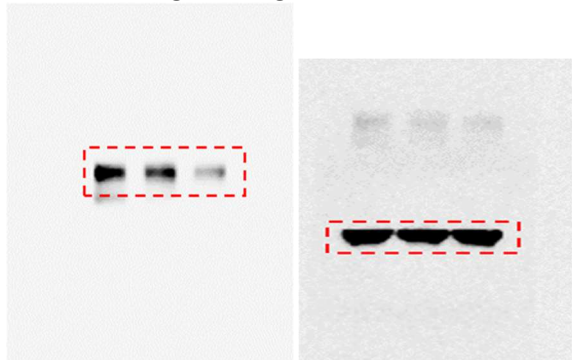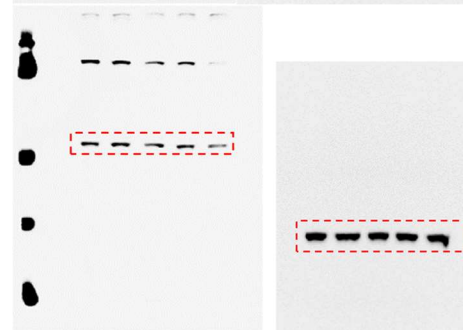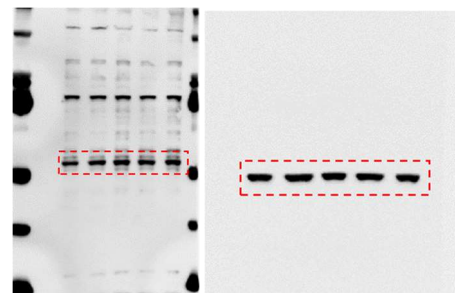

Full unedited gel for Figure 1F:

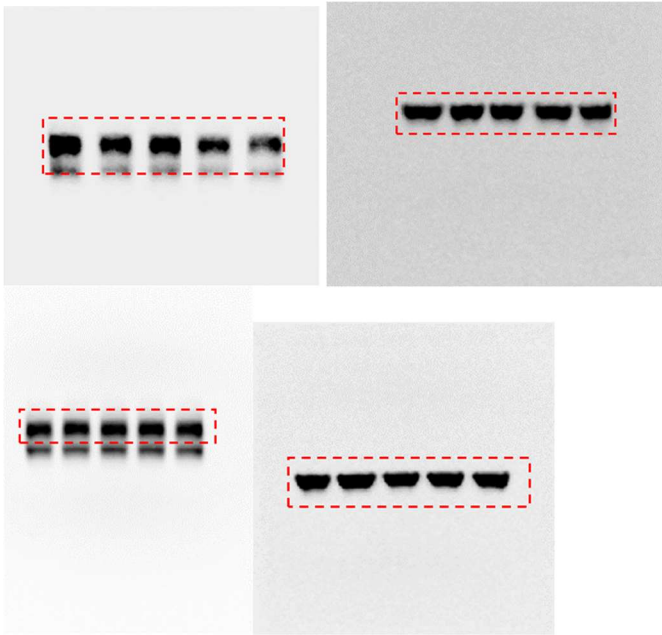

Full unedited gel for Figure 2A:

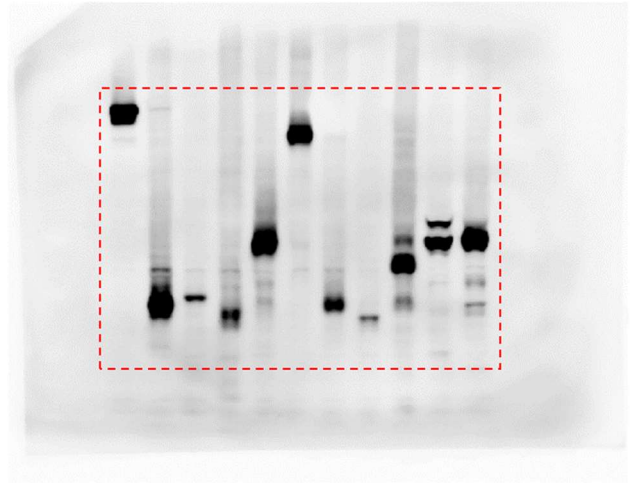

Full unedited gel for Figure 1G:

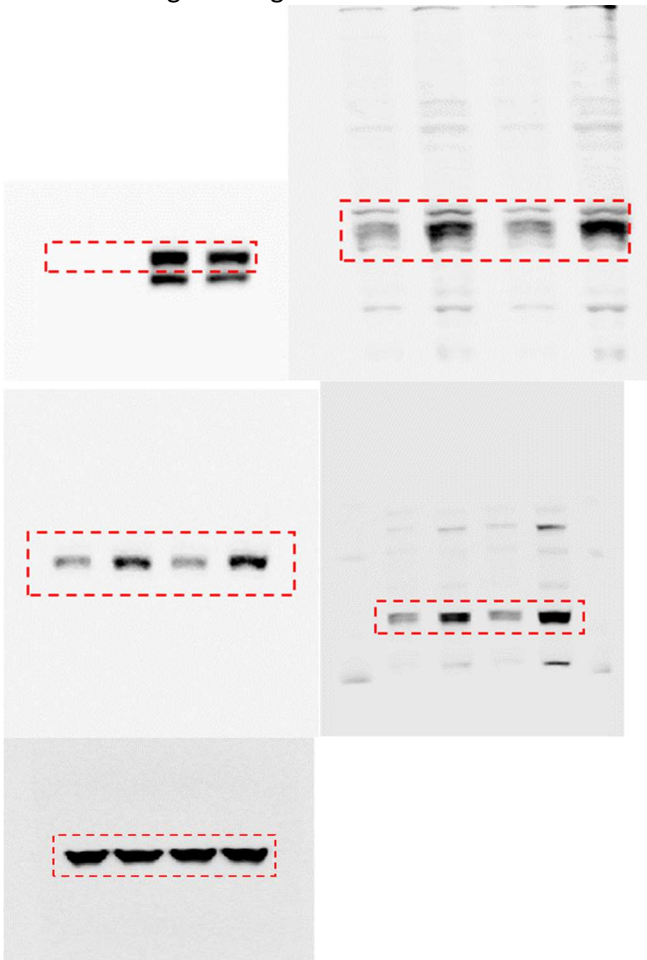

Full unedited gel for Figure 2B:

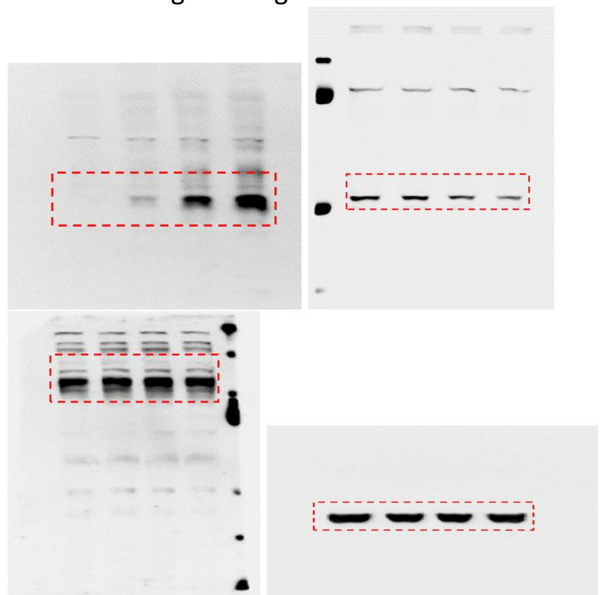

Full unedited gel for Figure 2C:

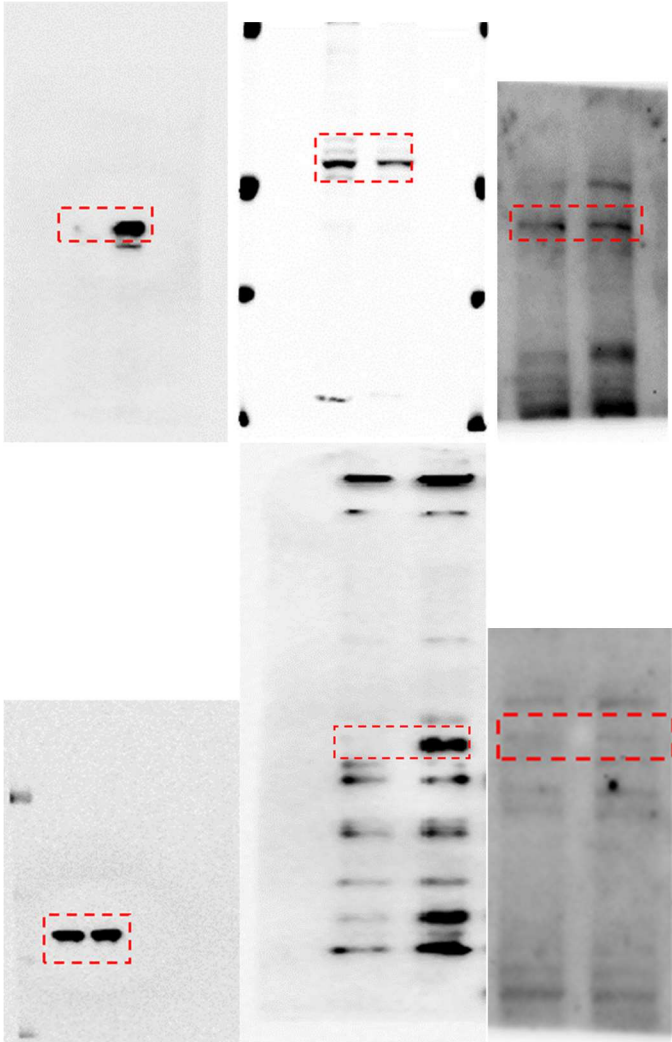

Full unedited gel for Figure 2E:

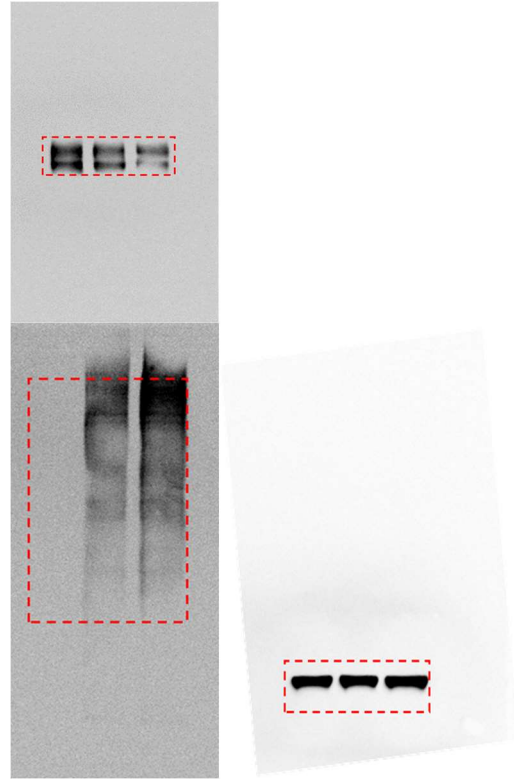

Full unedited gel for Figure 2F:

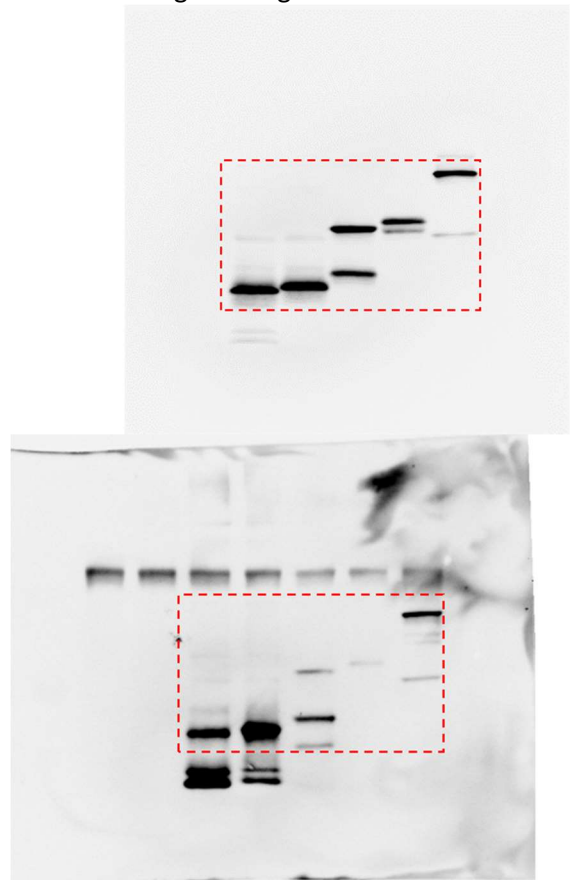

Full unedited gel for Figure 2D:

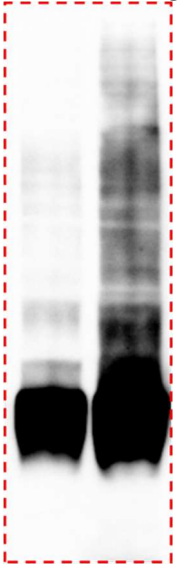

Full unedited gel for Figure 2G:

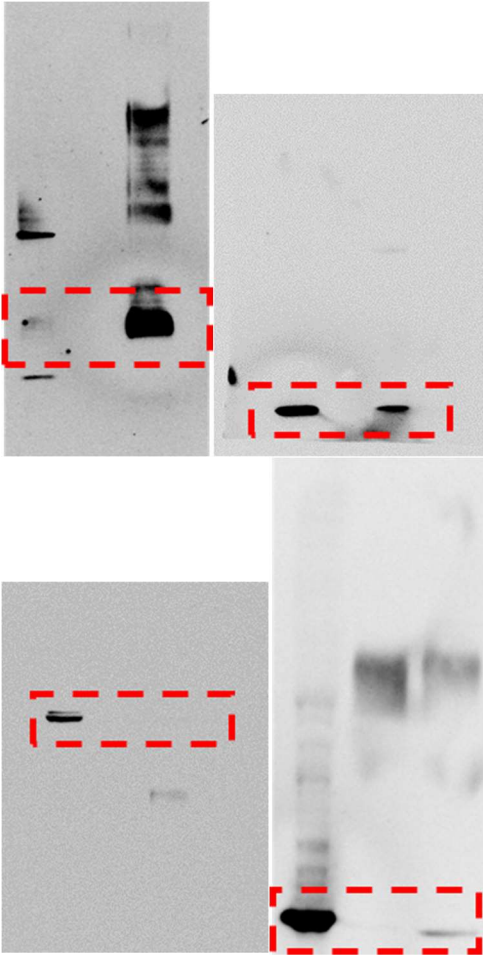

Full unedited gel for Figure 2H:

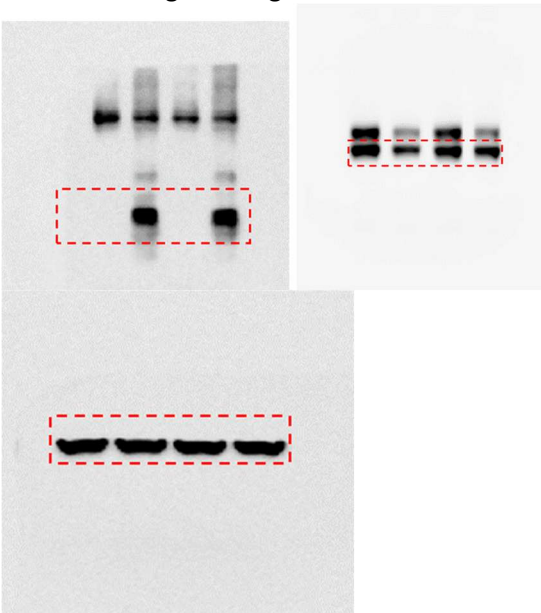

Full unedited gel for Figure 3A:

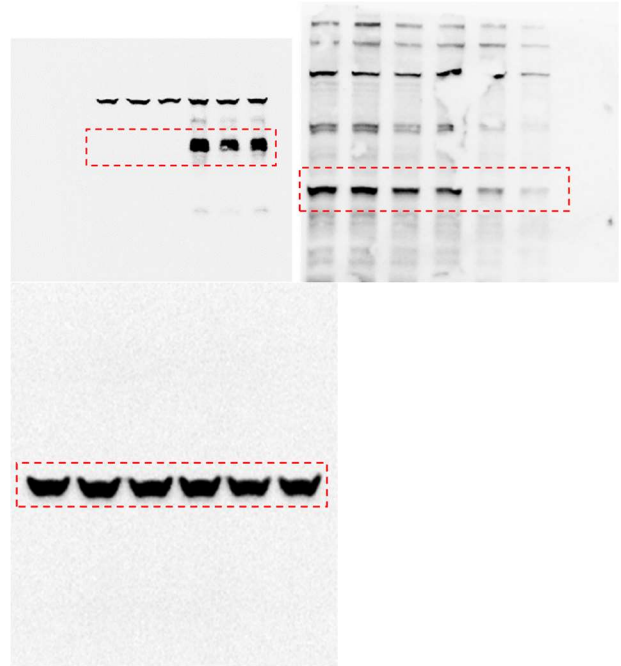

Full unedited gel for Figure 3B:

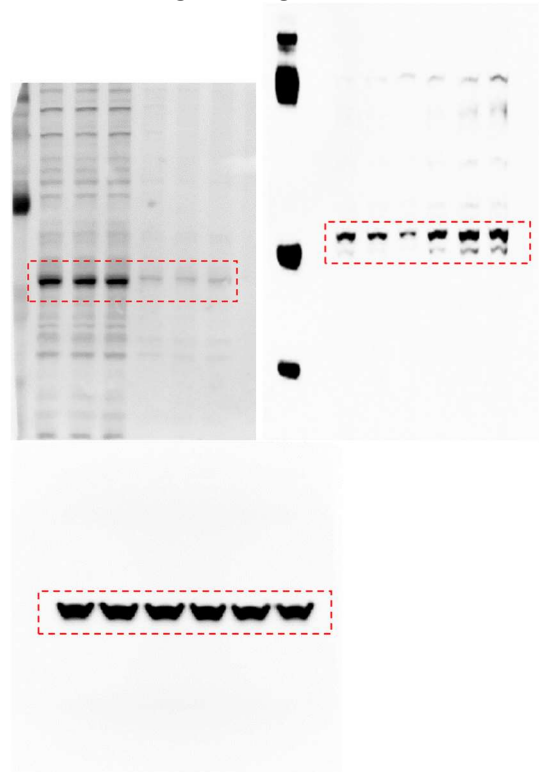

Full unedited gel for Figure 3C:

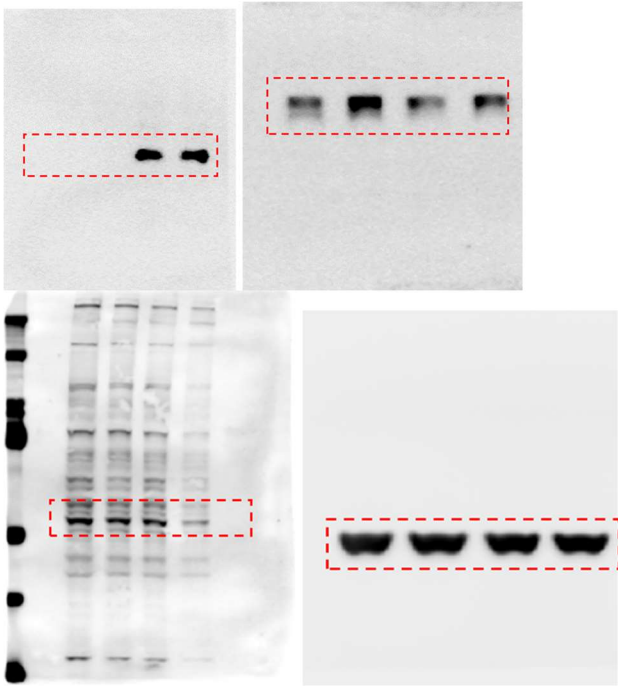

Full unedited gel for Figure 4B:

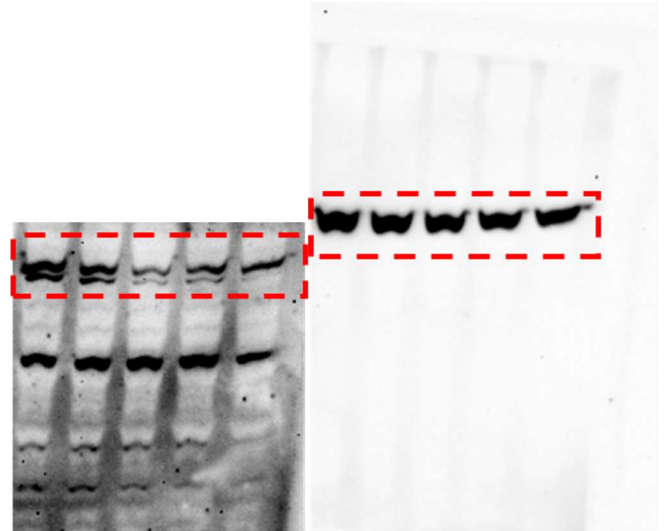

Full unedited gel for Figure 4C:

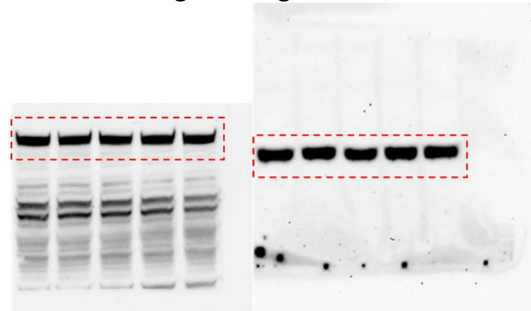

Full unedited gel for Figure 3D:

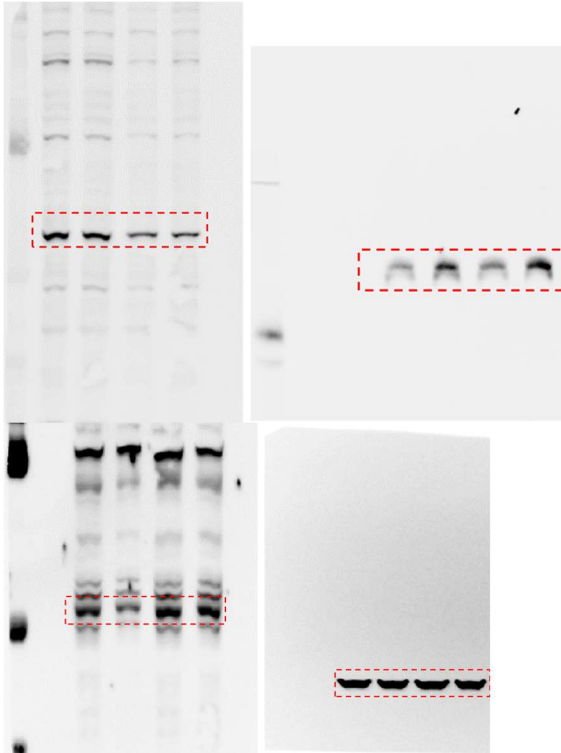

Full unedited gel for Figure 4E:

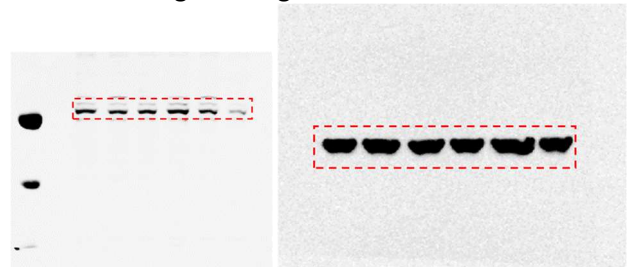

Full unedited gel for Figure 5A:

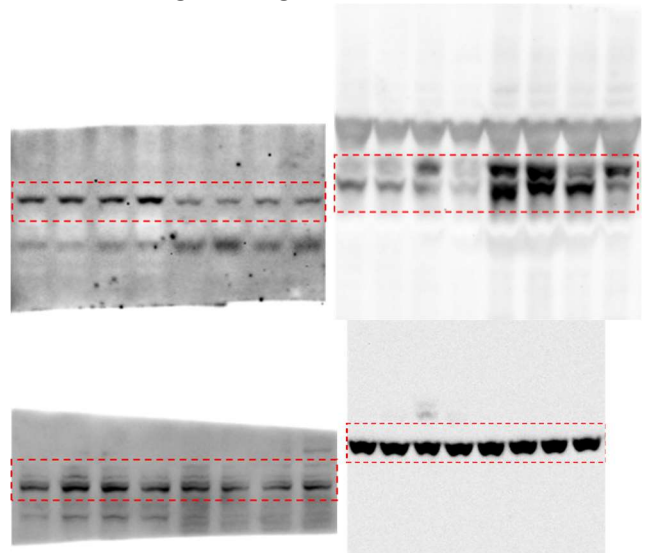

Full unedited gel for Figure 4A:

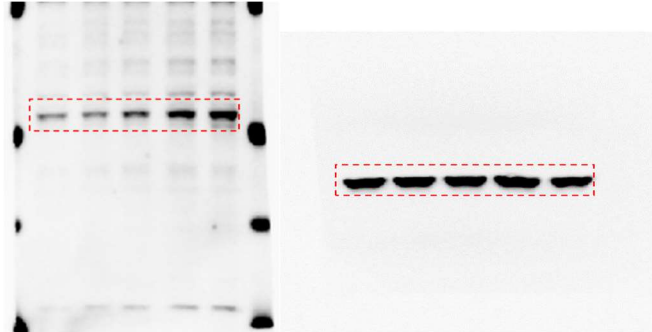

Full unedited gel for Figure S1A:

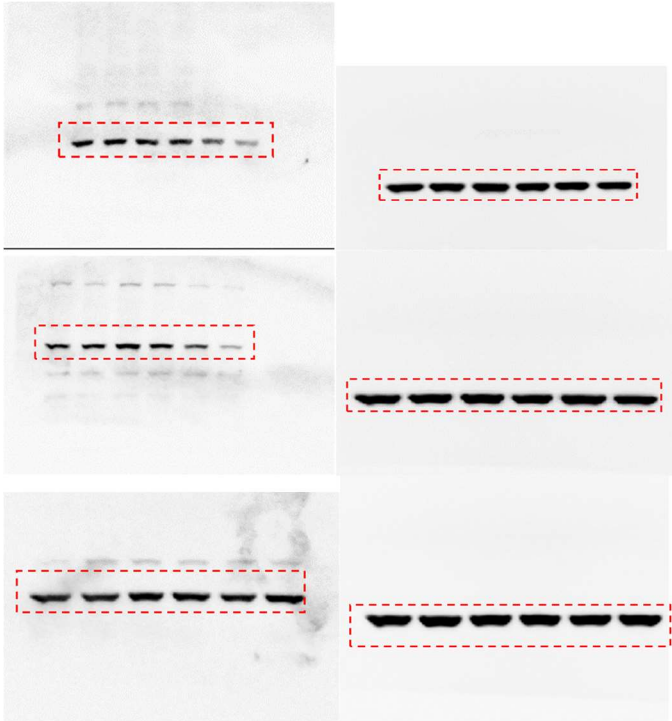

Full unedited gel for Figure S1C:

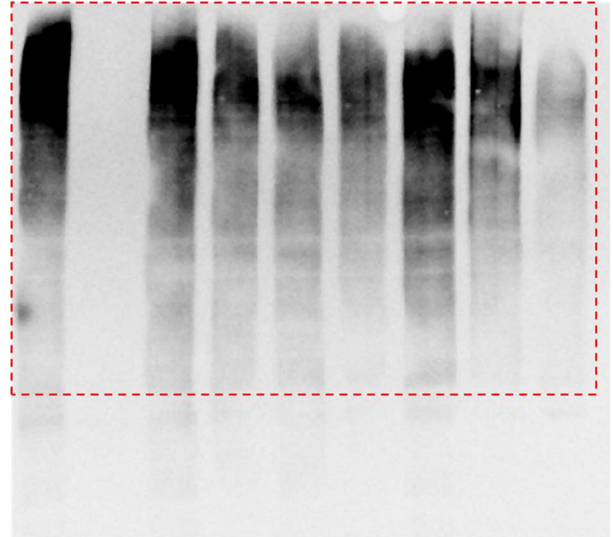

Full unedited gel for Figure S1D:

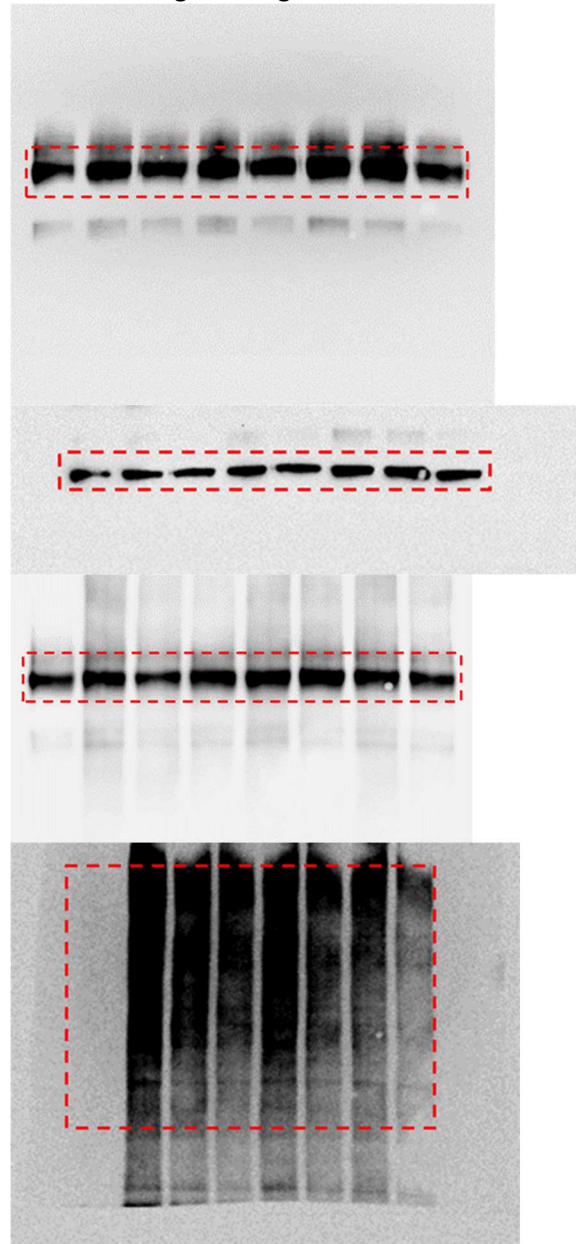

Full unedited gel for Figure S1B:

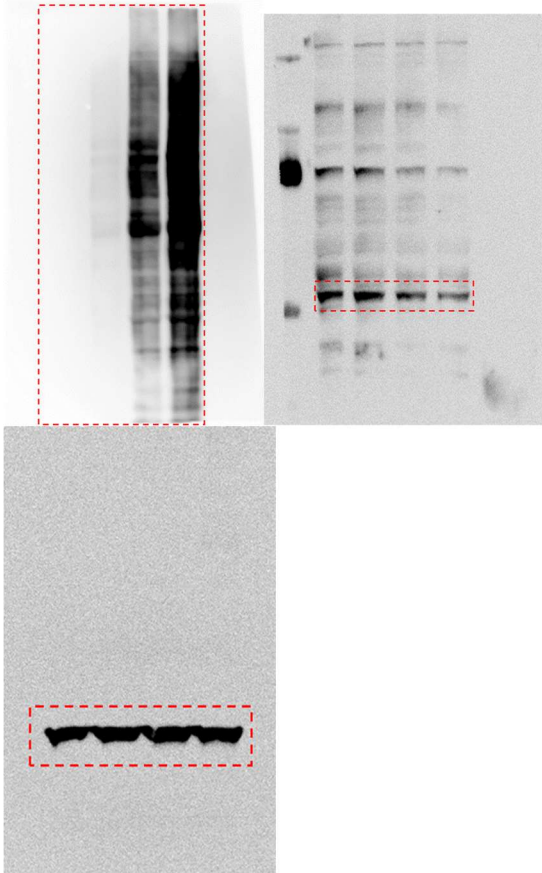

Full unedited gel for Figure S2C:

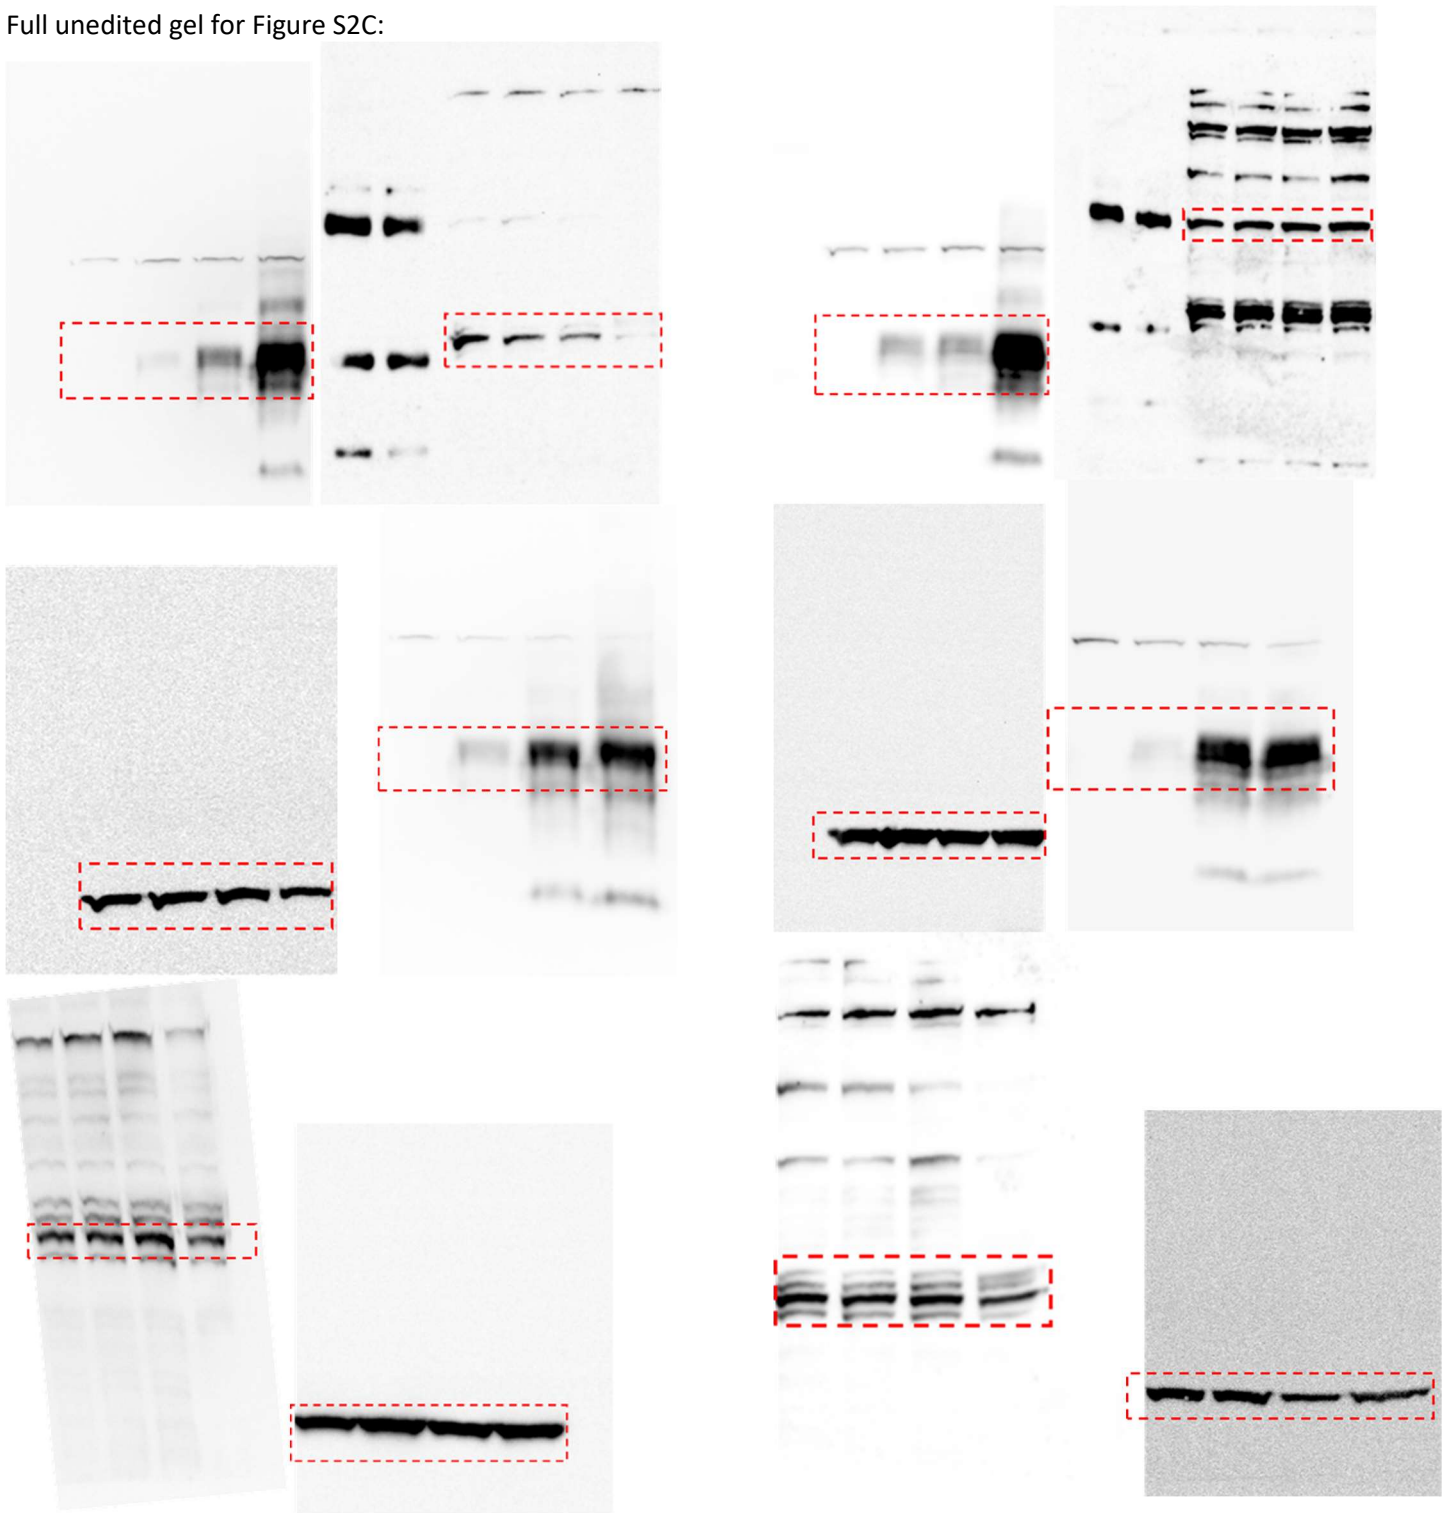

Full unedited gel for Figure S2D:

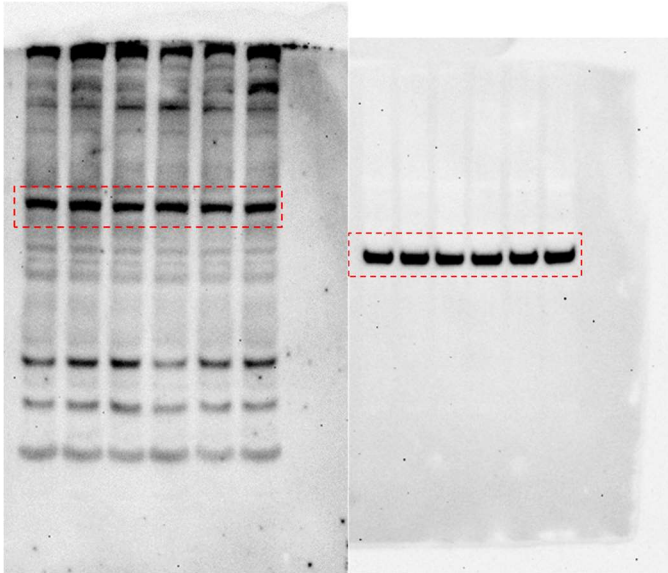

Full unedited gel for Figure S6C:

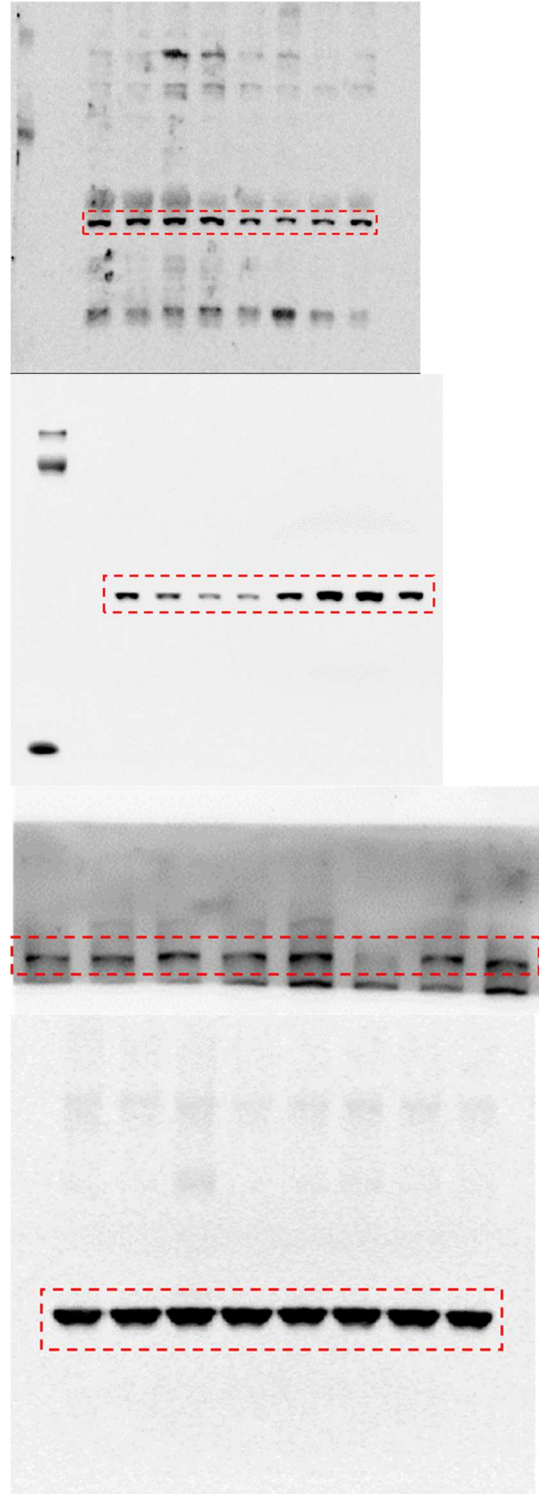

Full unedited gel for Figure S3A:

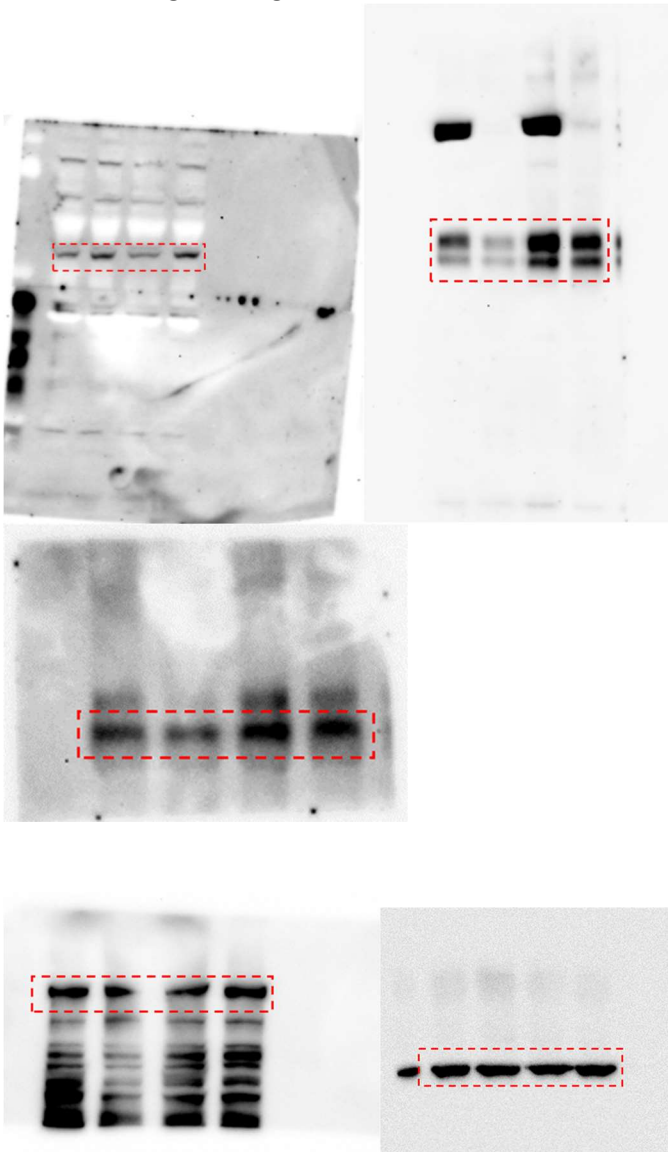

Supplement: sd1 [file 1]
